# Supplementary material for: Poly(3,4-ethylenedioxythiophene)-tosylate (PEDOT-Tos) electrodes in thermogalvanic cells
Source: PubMed Central journal article supplement (PMC5735355; doi:10.1039/c7ta04891b), 2017-09-06
Supplement: TA-005-C7TA04891B-s001.pdf [file TA-005-C7TA04891B-s001.pdf]

Electronic Supporting Information

## Poly(3,4-ethylenedioxythiophene)-Tosylate (PEDOT-Tos) electrode in Thermogalvanic Cells

Kosala Wijeratne, Mikhail Vagin, Robert Brooke and Xavier Crispin\*

\*Email: xavier.crispin@liu.se

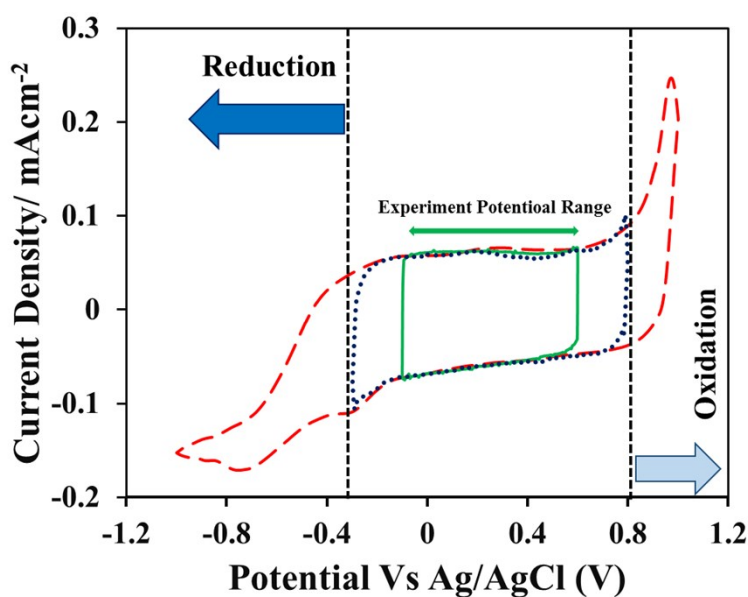

Figure S1 Cyclic voltammetry of the background electrolyte KCl without redox couple at scan rate of 20 mV/s to display the PEDOT-Tos reaction potential.

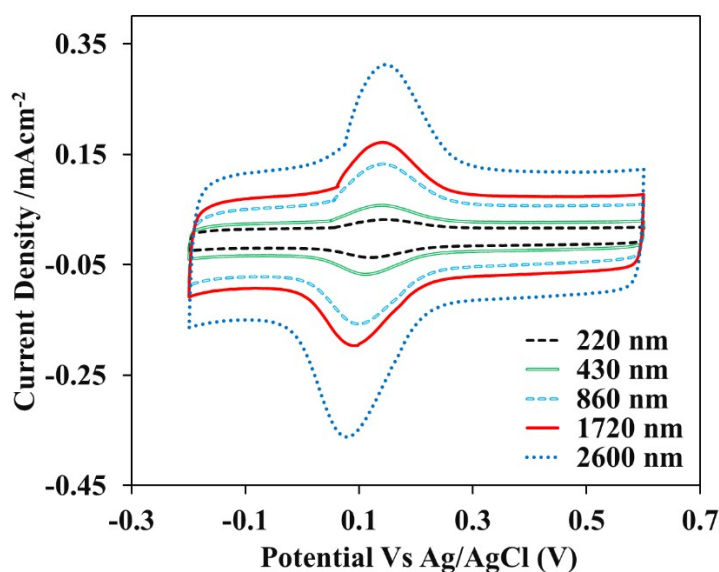

Figure S2 Cyclic voltammetry of the redox couple adsorbed PEDOT-Tos in background electrolyte KCl at scan rate of 10 mV/s.

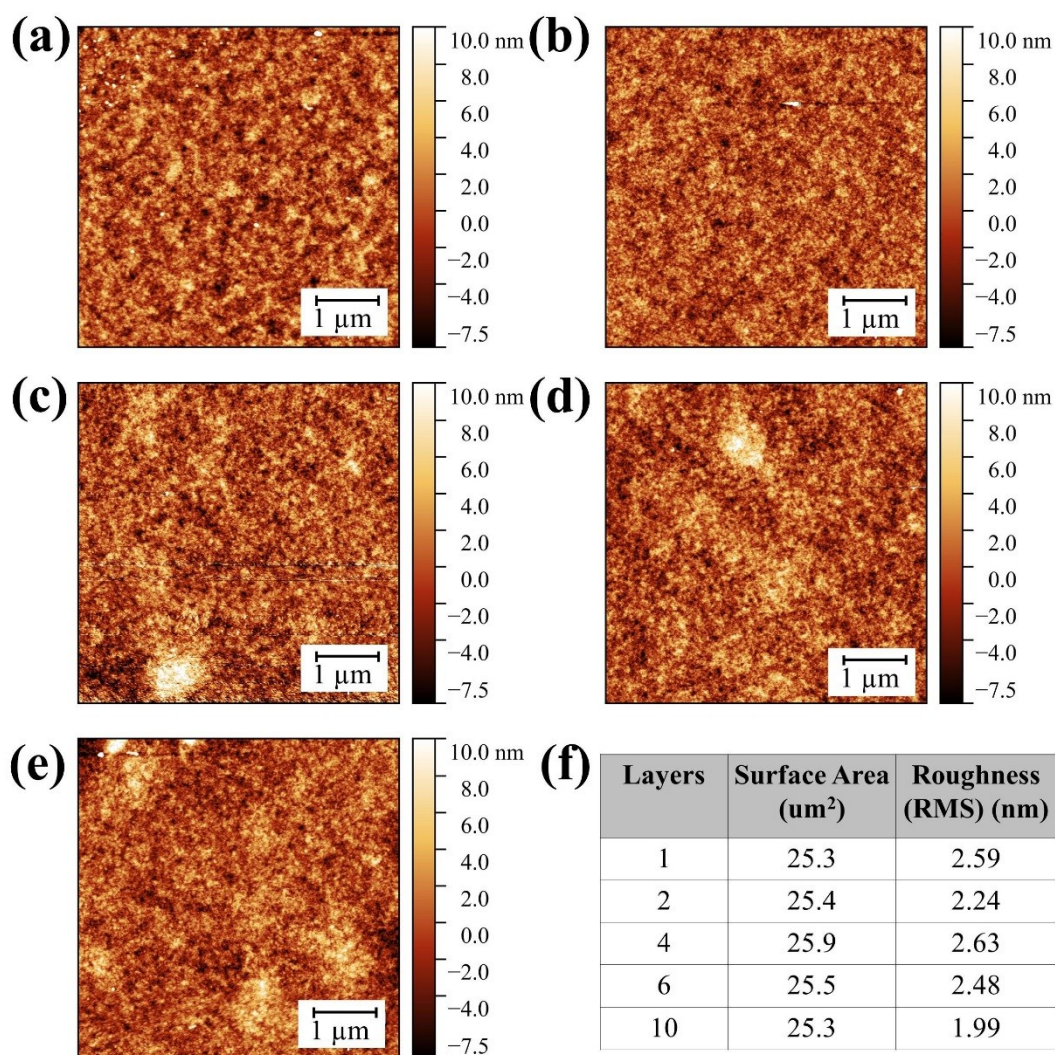

Figure S3. Topography images of different thickness of PEDOT-Tos (a) 223 nm, (b) 430 nm, (c) 860 nm, (d) 1720 nm, (e) 2600 nm

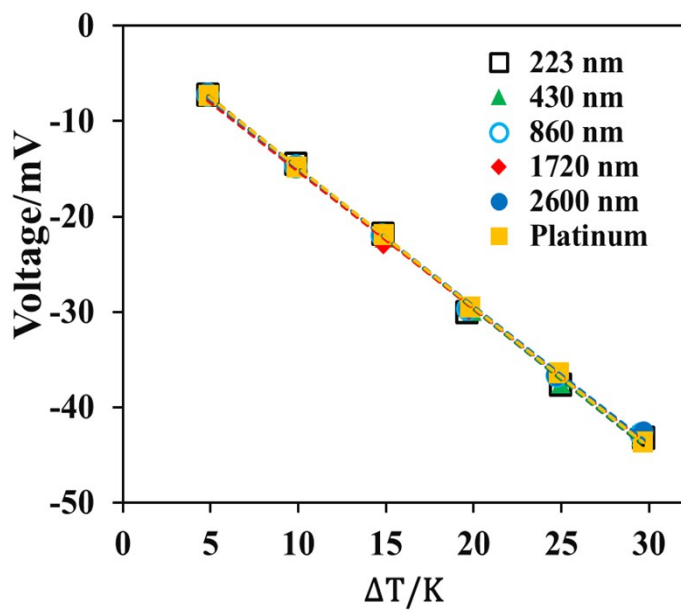

Figure S4. Dependence of thermal voltage on temperature difference for different thickness of PEDOT-Tos electrode.

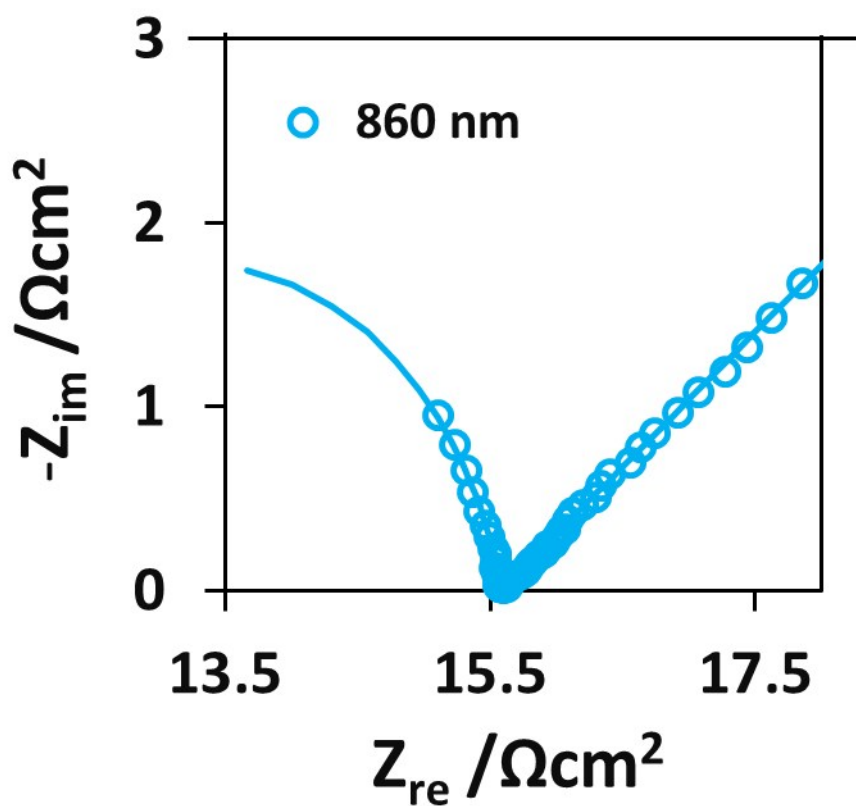

Figure S5. Nyquist plot for 860 nm PEDOT-Tos electrode

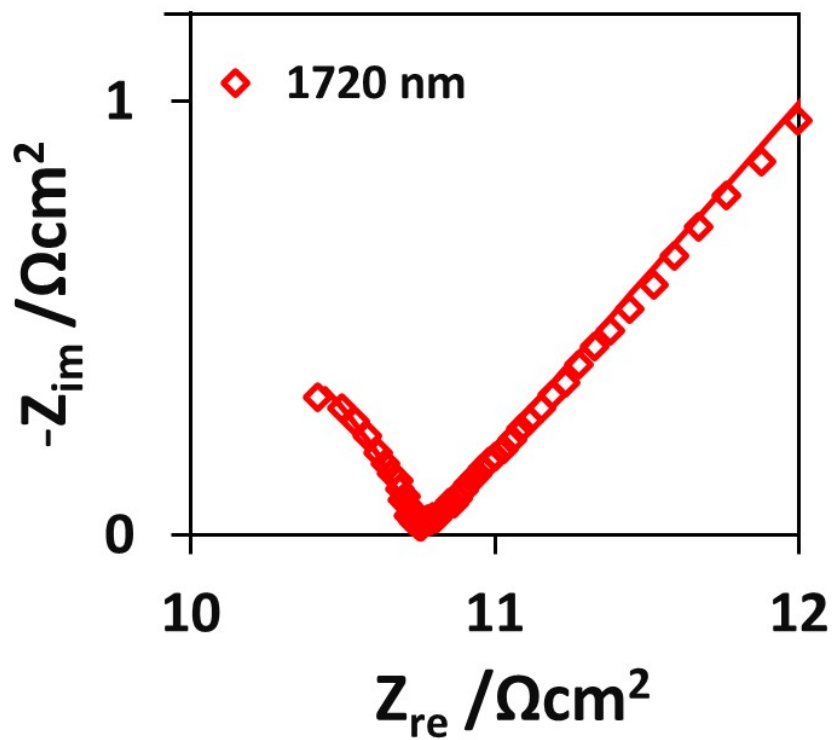

Figure S5. Nyquist plot for 1720 nm PEDOT-Tos electrode

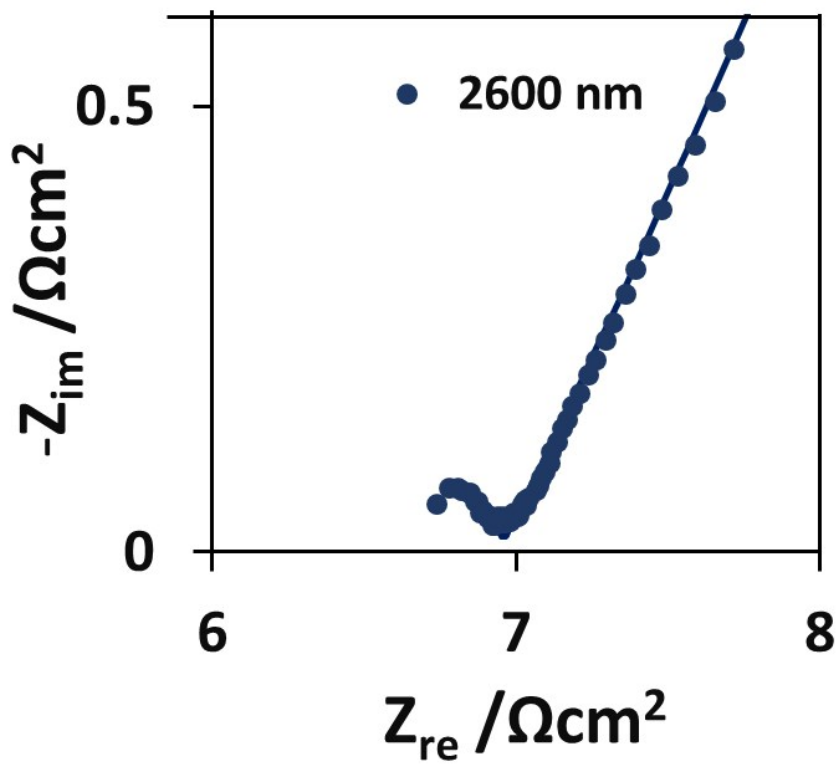

Figure S7. Nyquist plot for 2620 nm PEDOT-Tos electrode

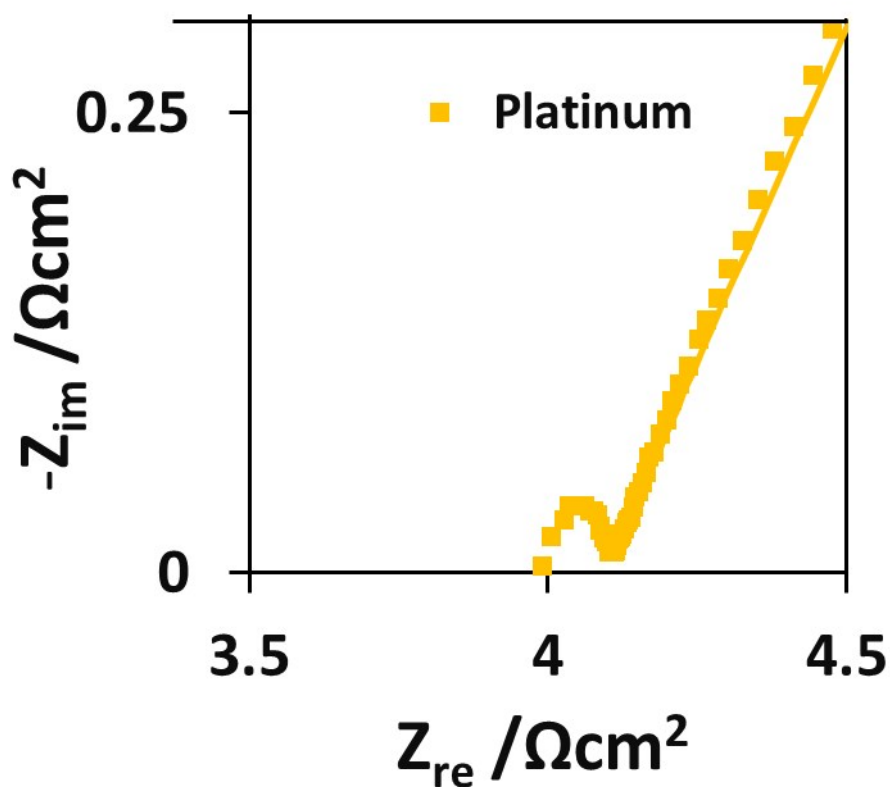

Figure S8. Nyquist plot for Platinum electrode

Table S1. Impedance Spectroscopy analysis results of different thickness of PEDOT-Tos electrodes

| Electrode thickness/nm | $R_s / \Omega \cdot \text{cm}^2$<br>(+/- 2%) | $R_{ct} / \Omega \cdot \text{cm}^2$<br>(+/- 2%) | $R_f / \Omega \cdot \text{cm}^2$<br>(+/- 2%) | $C_{dl} / \mu\text{F} / \text{cm}^2$<br>(+/- 2%) | $C_f / \text{F} / \text{cm}^2$<br>(+/- 2%) | $W / \Omega \text{s}^{-1/2} \cdot \text{cm}^2$<br>(+/- 2%) |
|------------------------|----------------------------------------------|-------------------------------------------------|----------------------------------------------|--------------------------------------------------|--------------------------------------------|------------------------------------------------------------|
| 223                    | 17.00                                        | 25.94                                           | 31.15                                        | 0.044                                            | 0.544                                      | 220.25                                                     |
| 430                    | 14.46                                        | 12.72                                           | 17.05                                        | 0.18                                             | 0.728                                      | 171.48                                                     |
| 860                    | 11.10                                        | 4.48                                            | 11.02                                        | 0.58                                             | 0.803                                      | 64.53                                                      |
| 1720                   | 9.02                                         | 1.72                                            | 5.66                                         | 5.89                                             | 0.848                                      | 13.05                                                      |
| 2600                   | 6.73                                         | 0.22                                            | 3.52                                         | 86.3                                             | 0.861                                      | 6.95                                                       |
| Platinum               | 4.00                                         | 0.086                                           | 0.063                                        | 23.9                                             | 0.827                                      | 2.89                                                       |
